# Supplementary material
Source: PubMed Central journal article supplement (PMC7062218)
Supplement: ASN.2019030312SupplementaryData1.pdf [file ASN.2019030312SupplementaryData1.pdf]

## **Supplementary Table of Contents**

**Supplemental Figure 1: Dynamic range. Protein copy numbers of podocytes isolated from a single mouse.**

**Supplemental Figure 2: Different modes of injury cause an upregulation of metabolic signaling and a down-regulation of actin-cytoskeleton associated pathways.**

**Supplemental Figure 3: Immunohistochemistry on human FSGS and Podocin knockout tissue revealed an increased Filamin-B expression**

**Supplemental Figure 4: Overview of this study demonstrating the applicability of sensitive proteomics for phenotype-proteome correlations.**

**Supplemental Table 1: Proteome data from the Doxorubicin study.**

**Supplemental Table 2: Nephrocyte proteome data.**

**Supplemental Table 3: List of peptides used in targeted proteomics.**

**Supplemental Table 4: Proteome data from the LPS study.**

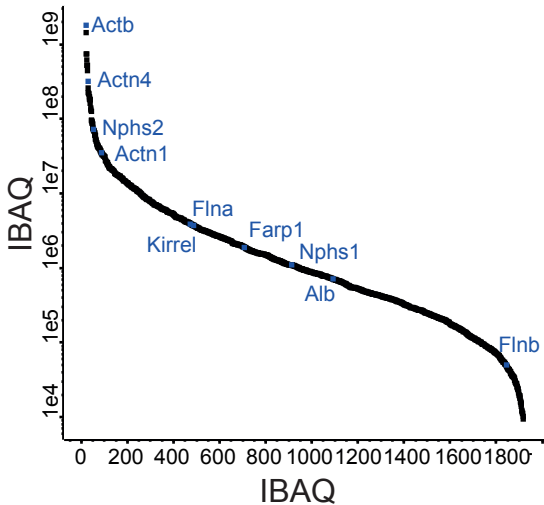

Supp Figure 1 Koehler et al.

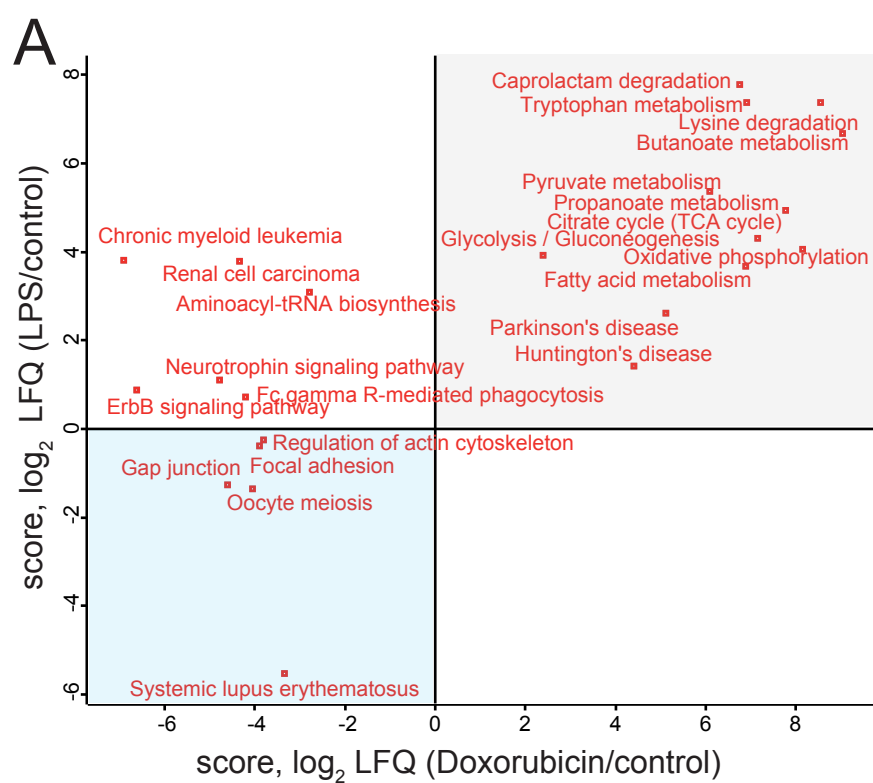

**B** REGULATION OF THE ACTIN CYTOSKELETON

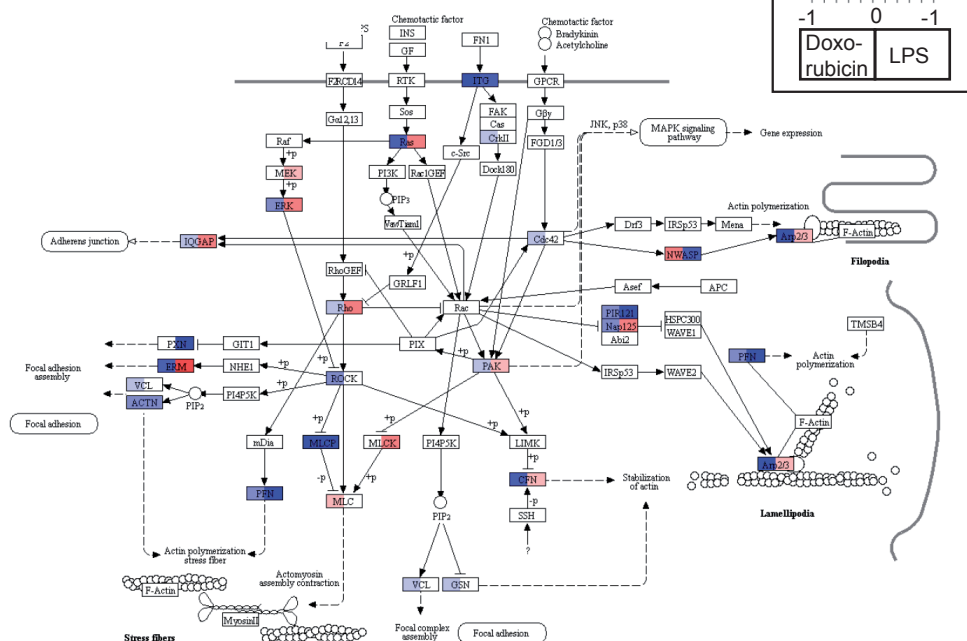

Data on KEGG graph  
Rendered by Pathview

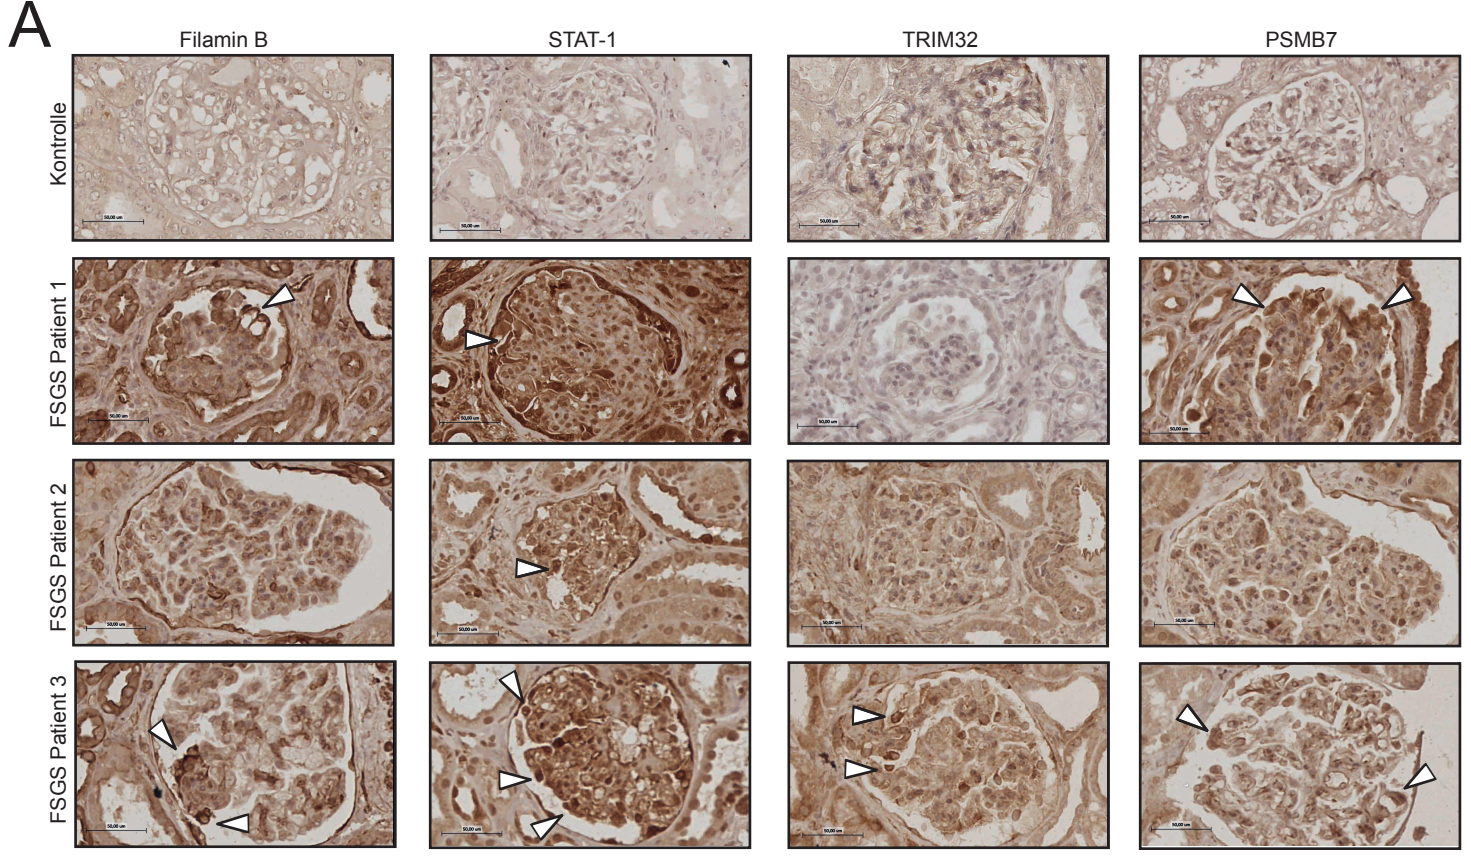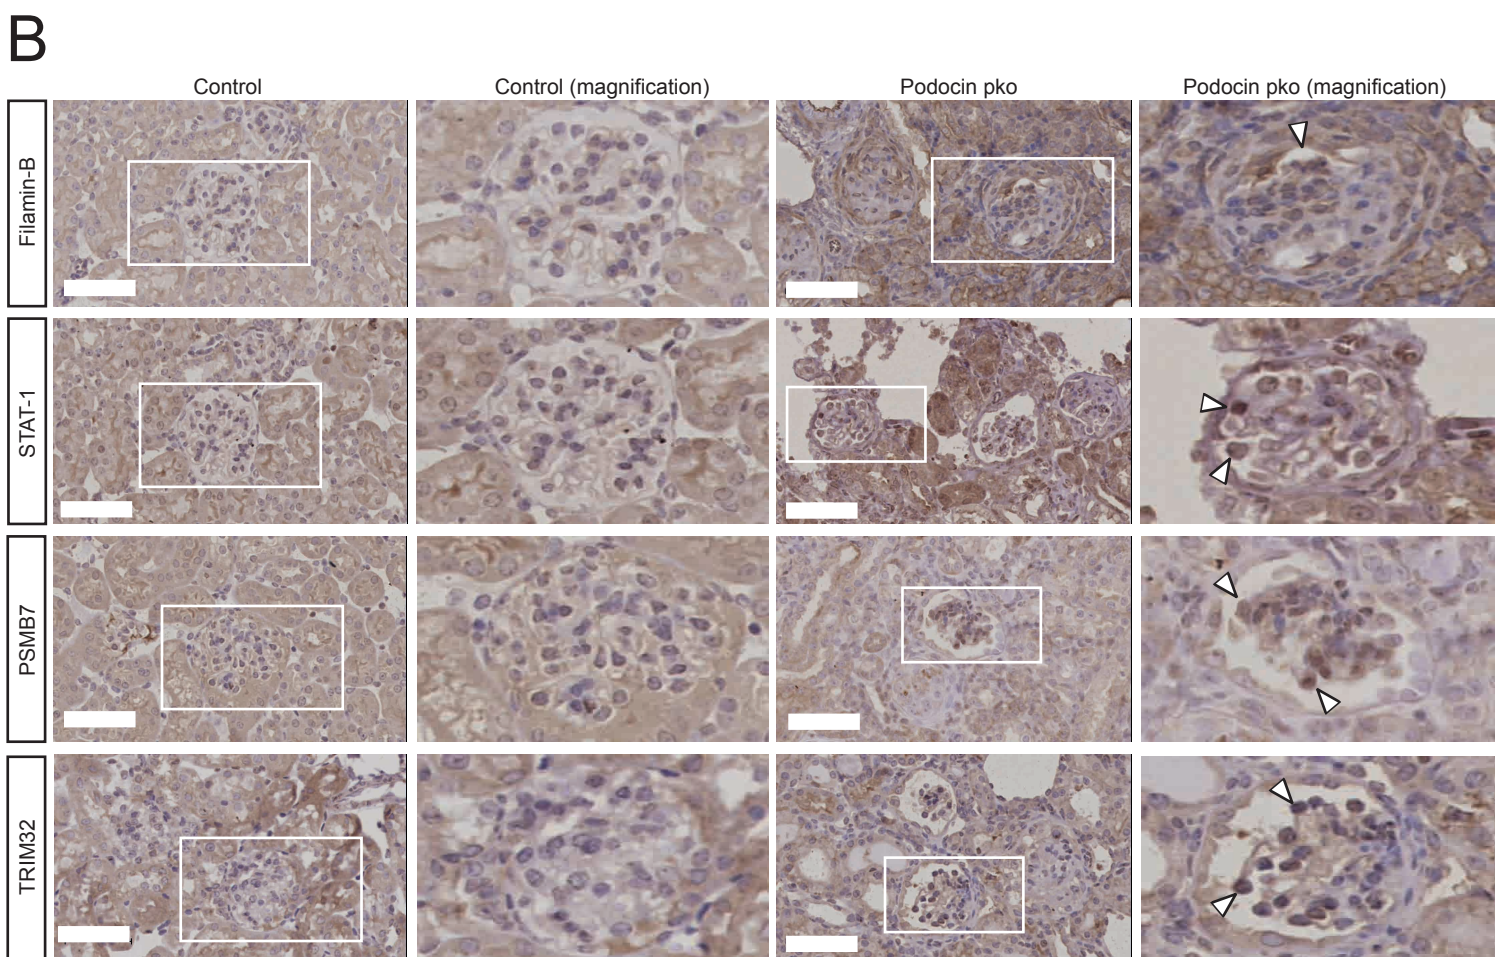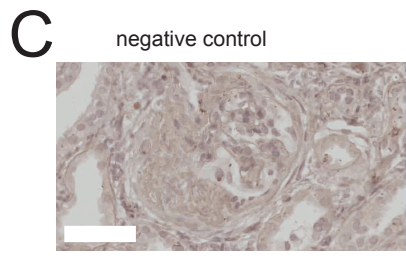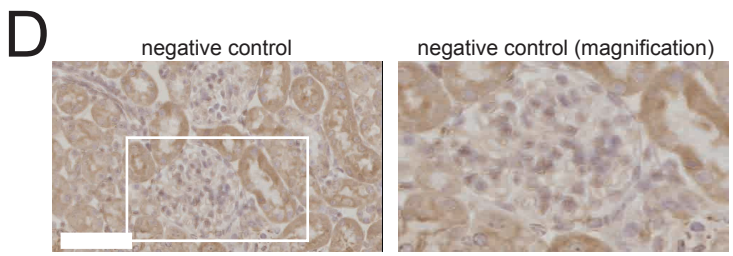

Proteomics of human tissue

human FSGS patient glomerular proteomics

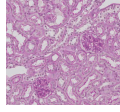

underrepresentation of podocyte-specific proteins

Proteomics of podocyte injury

Ultrasensitive proteomics

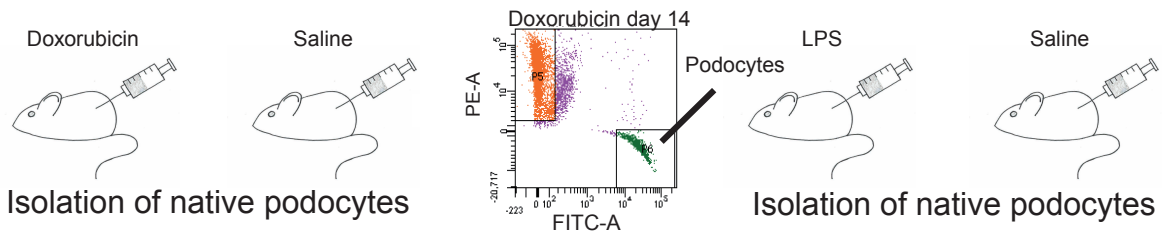

Isolation of native podocytes

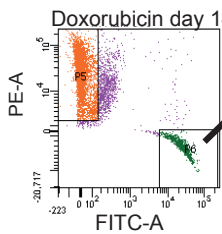

Isolation of native podocytes

FACS sorting  
225 changed proteins      120 changed proteins

Prioritization

Correlation of phenotype and protein expression

Increased Filamin-B

Functional analysis

- higher expression of Filamin-B in human FSGS and Podocin ko tissue
- Filamin-Albumin-correlation in rat glomeruli treated with PAN
- elevated filtration upon loss of Cher/dFilamin in *Drosophila* nephrocytes
- increased Filamin levels in cells exposed to mechanical-stress

Disease mechanism

## Supplementary Figure Legends

**Supplemental Figure 1: Dynamic range. Protein copy numbers of podocytes isolated from a single mouse.** The podocyte protein copy numbers are depicted as  $\log_{10}(\text{iBAQ})$ , a parameter corresponding to protein copy number.

**Supplemental Figure 2: Different modes of injury cause an upregulation of metabolic signaling and a down-regulation of actin-cytoskeleton associated pathways.** **A** Comparison of LFQ values of Doxorubicin and LPS treated animals using KEGG pathways revealed an up-regulation of metabolic signaling including citrate cycle, glycolysis and fatty acid metabolism. A common down-regulation was observed for actin-cytoskeleton associated pathways such as gap junctions, focal adhesions and regulation of the actin cytoskeleton. **B** KEGG pathway analysis revealed differential regulation of actin-cytoskeleton associated proteins in Doxorubicin and LPS treated mice.

**Supplemental Figure 3: Immunohistochemistry on human FSGS and Podocin knockout tissue revealed an increased Filamin-B expression** **A** Immunohistochemistry of FSGS patient samples revealed an increased expression of Filamin-B, STAT-1, Trim32 and PSMB7 upon podocyte injury. Scale bar = 50  $\mu\text{m}$ . Arrowheads mark positive podocytes. **B** Immunohistochemistry of kidney tissue from Podocin knockout mice also revealed an increased expression of Filamin-B, STAT-1, TRIM32 and PSMB7 upon podocyte injury. **C,D** Human and mouse tissue stained without a primary antibody served as negative control. Scale bar = 50  $\mu\text{m}$ .

**Supplemental Figure 4: Overview of this study demonstrating the applicability of sensitive proteomics for phenotype-proteome correlations.**
